# Supplementary material for: Unveiling Diversity for Quality Traits in the Indian Landraces of Horsegram [Macrotyloma uniflorum (Lam.) Verdc.]
Source: MDPI journal article supplement (doi:10.3390/plants12223803), 2023-11-08
Supplement: s1 [file s1]

# Unveiling diversity for quality traits in Horsegram [*Macrotyloma uniflorum* (Lam.) Verdc.] landraces: A forgotten nutraceutical pulse crop of ancient India

Manju Kumari<sup>1,2</sup>, Siddhant Ranjan Padhi<sup>1,2</sup>, Sushil Kumar Chourey<sup>2</sup>, Vishal Kondal<sup>2</sup>, Swapnil S. Thakare<sup>3</sup>, Ankita Negi<sup>3</sup>, Veena Gupta<sup>2</sup>, Mamta Arya<sup>2</sup>, Jeshima KhanYasin<sup>2</sup>, Rakesh Singh<sup>2</sup>, Chellapilla Bhardwaj<sup>4</sup>, Atul Kumar<sup>4</sup>, Kailash Chandra Bhatt<sup>2\*</sup>, Rakesh Bhardwaj<sup>2\*</sup>, J C Rana<sup>5</sup>, Tanay Joshi<sup>6</sup> and Amritbir Riar<sup>6</sup>

**Supplementary Table S1.** Observed values for the traits investigated in the study

| S.No. | IC Number | State            | Protein<br>(g/100g) | Starch<br>(g/100g) | Sugars<br>(g/100g) | Phytic acid<br>(mg/g) | Phenols<br>(mg GAE/g) |
|-------|-----------|------------------|---------------------|--------------------|--------------------|-----------------------|-----------------------|
| 1     | IC432011  | Maharashtra      | 24.15               | 29.81              | 5.94               | 17.00                 | 10.40                 |
| 2     | IC432059  | Maharashtra      | 23.29               | 30.25              | 7.94               | 21.15                 | 9.06                  |
| 3     | IC278831  | Himachal Pradesh | 22.57               | 30.03              | 8.30               | 8.56                  | 8.42                  |
| 4     | IC278832  | Himachal Pradesh | 23.61               | 29.58              | 9.24               | 10.77                 | 9.09                  |
| 5     | IC383470  | Uttarakhand      | 22.20               | 30.33              | 8.50               | 10.66                 | 8.32                  |
| 6     | IC406524  | Uttarakhand      | 24.73               | 30.44              | 7.76               | 7.05                  | 8.69                  |
| 7     | IC392511  | Uttarakhand      | 23.51               | 29.64              | 5.63               | 5.52                  | 7.86                  |
| 8     | IC469855  | Uttarakhand      | 23.07               | 29.92              | 5.93               | 7.55                  | 9.47                  |
| 9     | IC469794  | Uttarakhand      | 22.87               | 28.76              | 5.01               | 10.62                 | 9.19                  |
| 10    | IC263263  | Uttarakhand      | 23.60               | 29.29              | 9.27               | 6.87                  | 8.45                  |
| 11    | IC263264  | Uttarakhand      | 22.72               | 30.39              | 7.98               | 12.79                 | 8.92                  |
| 12    | IC263277  | Uttarakhand      | 22.24               | 29.82              | 7.99               | 13.22                 | 8.16                  |
| 13    | IC263294  | Uttarakhand      | 24.75               | 26.62              | 8.06               | 11.67                 | 9.39                  |
| 14    | IC356050  | Uttarakhand      | 24.13               | 30.97              | 9.34               | 10.35                 | 8.80                  |
| 15    | IC382656  | Uttarakhand      | 23.68               | 30.78              | 6.75               | 10.58                 | 8.27                  |
| 16    | IC561027  | Jharkhand        | 24.23               | 28.40              | 5.51               | 4.64                  | 7.00                  |
| 17    | IC561029  | Jharkhand        | 24.74               | 27.21              | 5.76               | 5.12                  | 8.82                  |
| 18    | IC382218  | Himachal Pradesh | 23.24               | 30.34              | 4.95               | 10.79                 | 8.04                  |
| 19    | IC361651  | Himachal Pradesh | 23.24               | 30.05              | 5.07               | 10.86                 | 8.45                  |
| 20    | IC310660  | Rajasthan        | 23.85               | 29.16              | 7.78               | 10.85                 | 6.89                  |
| 21    | IC278825  | Himachal Pradesh | 23.76               | 27.67              | 6.19               | 7.41                  | 11.26                 |
| 22    | IC278827  | Himachal Pradesh | 23.46               | 28.99              | 8.13               | 10.84                 | 8.03                  |
| 23    | IC278829  | Himachal Pradesh | 23.92               | 29.99              | 8.90               | 13.92                 | 7.04                  |
| 24    | IC278830  | Himachal Pradesh | 24.42               | 28.30              | 8.72               | 8.82                  | 8.11                  |
| 25    | IC281653  | Uttarakhand      | 22.80               | 28.85              | 5.69               | 1.88                  | 9.24                  |
| 26    | IC281651  | Uttarakhand      | 23.10               | 31.14              | 6.00               | 4.79                  | 7.61                  |
| 27    | IC281624  | Uttarakhand      | 23.21               | 30.86              | 8.05               | 5.48                  | 8.56                  |
| 28    | IC281835  | Uttarakhand      | 22.46               | 30.83              | 5.94               | 9.63                  | 7.26                  |
| 29    | IC281820  | Uttarakhand      | 23.24               | 29.94              | 8.02               | 3.41                  | 8.38                  |
| 30    | IC469752  | Uttarakhand      | 21.79               | 31.52              | 5.16               | 8.20                  | 8.83                  |
| 31    | IC469766  | Uttarakhand      | 21.92               | 32.38              | 8.24               | 11.57                 | 8.34                  |
| 32    | IC469827  | Uttarakhand      | 22.07               | 30.49              | 5.35               | 10.18                 | 8.11                  |
| 33    | IC396009  | Chattisgarh      | 25.06               | 27.70              | 5.85               | 11.08                 | 6.64                  |
| 34    | IC396012  | Chattisgarh      | 23.53               | 28.31              | 6.50               | 5.95                  | 6.80                  |
| 35    | IC561021  | Jharkhand        | 24.19               | 29.69              | 5.47               | 6.55                  | 7.74                  |
| 36    | IC263319  | Uttarakhand      | 23.35               | 30.68              | 5.42               | 11.44                 | 7.16                  |

| S.No. | IC Number  | State             | Protein<br>(g/100g) | Starch<br>(g/100g) | Sugars<br>(g/100g) | Phytic acid<br>(mg/g) | Phenols<br>(mg GAE/g) |
|-------|------------|-------------------|---------------------|--------------------|--------------------|-----------------------|-----------------------|
| 37    | IC263325   | Uttarakhand       | 23.63               | 29.00              | 5.90               | 12.42                 | 8.67                  |
| 38    | IC263332   | Uttarakhand       | 23.90               | 31.56              | 5.78               | 10.80                 | 9.33                  |
| 39    | IC400120   | Odisha            | 23.72               | 30.65              | 7.90               | 18.68                 | 9.38                  |
| 40    | IC385840   | Jharkhand         | 24.15               | 29.17              | 8.74               | 14.95                 | 11.02                 |
| 41    | IC385919   | Jharkhand         | 23.44               | 29.06              | 8.19               | 17.70                 | 7.98                  |
| 42    | IC385923   | Jharkhand         | 24.16               | 28.07              | 8.06               | 16.22                 | 9.59                  |
| 43    | IC391416   | Uttarakhand       | 24.55               | 27.91              | 7.83               | 9.86                  | 8.57                  |
| 44    | IC391572   | Uttarakhand       | 24.23               | 31.35              | 8.19               | 11.50                 | 8.57                  |
| 45    | IC426475   | Andhra Pradesh    | 24.88               | 29.53              | 8.19               | 15.79                 | 7.82                  |
| 46    | IC397423   | Madhya Pradesh    | 23.98               | 30.30              | 7.92               | 11.01                 | 7.40                  |
| 47    | IC397441   | Madhya Pradesh    | 23.40               | 29.14              | 8.09               | 13.69                 | 7.72                  |
| 48    | IC397443   | Madhya Pradesh    | 24.36               | 30.39              | 5.80               | 18.05                 | 6.81                  |
| 49    | IC397461   | Madhya Pradesh    | 22.62               | 29.28              | 8.31               | 9.20                  | 8.94                  |
| 50    | IC397465   | Madhya Pradesh    | 22.14               | 30.90              | 8.64               | 12.36                 | 8.48                  |
| 51    | IC397479   | Madhya Pradesh    | 23.83               | 29.32              | 9.16               | 13.74                 | 7.73                  |
| 52    | IC397511   | Madhya Pradesh    | 24.20               | 29.79              | 10.15              | 9.56                  | 5.77                  |
| 53    | IC397588   | Madhya Pradesh    | 24.04               | 31.10              | 9.11               | 13.26                 | 7.58                  |
| 54    | IC397611   | Madhya Pradesh    | 23.51               | 29.91              | 8.58               | 11.13                 | 10.22                 |
| 55    | IC423538   | Himachal Pradesh  | 23.26               | 29.83              | 7.88               | 6.02                  | 8.05                  |
| 56    | IC423572   | Himachal Pradesh  | 22.42               | 31.67              | 8.37               | 16.21                 | 6.97                  |
| 57    | IC418359   | Uttarakhand       | 23.34               | 32.15              | 8.24               | 12.48                 | 8.65                  |
| 58    | IC259884   | Odisha            | 22.75               | 29.84              | 8.57               | 9.12                  | 7.41                  |
| 59    | IC273740   | Chattisgarh       | 22.88               | 29.05              | 8.39               | 5.94                  | 9.26                  |
| 60    | IC273742   | Chattisgarh       | 24.07               | 29.88              | 8.07               | 8.54                  | 8.01                  |
| 61    | IC273743   | Chattisgarh       | 23.52               | 28.18              | 10.69              | 7.16                  | 7.75                  |
| 62    | IC273750   | Chattisgarh       | 24.13               | 28.37              | 8.48               | 5.74                  | 8.36                  |
| 63    | IC273748   | Chattisgarh       | 21.88               | 32.91              | 8.44               | 16.06                 | 7.53                  |
| 64    | IC265920   | Himachal Pradesh  | 22.40               | 30.39              | 12.10              | 10.34                 | 6.22                  |
| 65    | IC317402   | Odisha            | 23.82               | 29.73              | 7.78               | 8.36                  | 5.93                  |
| 66    | IC276108   | Arunachal Pradesh | 23.58               | 30.32              | 6.40               | 11.74                 | 8.25                  |
| 67    | IC262082   | Uttarakhand       | 23.74               | 30.14              | 7.57               | 8.04                  | 6.50                  |
| 68    | IC262106   | Uttarakhand       | 21.93               | 30.17              | 9.64               | 1.66                  | 8.85                  |
| 69    | IC262880   | Himachal Pradesh  | 22.53               | 30.91              | 8.35               | 4.56                  | 6.77                  |
| 70    | CRHG 19    | Andhra Pradesh    | 22.24               | 31.34              | 8.15               | 5.16                  | 6.54                  |
| 71    | CRIDA 18 R | Andhra Pradesh    | 23.73               | 29.51              | 8.16               | 7.23                  | 8.64                  |
| 72    | VL 19      | Uttarakhand       | 23.55               | 28.78              | 7.96               | 7.07                  | 8.60                  |
| 73    | BSP 1521   | Chattisgarh       | 23.86               | 28.35              | 9.53               | 1.07                  | 9.04                  |
| 74    | VL 15      | Uttarakhand       | 23.04               | 30.80              | 8.26               | 7.36                  | 8.82                  |
| 75    | IC145357   | Unknown           | 24.20               | 29.99              | 3.16               | 11.96                 | 4.39                  |
| 76    | IC139562   | Telangana         | 22.33               | 32.10              | 3.45               | 8.49                  | 6.28                  |
| 77    | IC139429   | Delhi             | 21.77               | 32.00              | 3.99               | 7.47                  | 6.97                  |
| 78    | IC023489   | Chattisgarh       | 24.88               | 28.20              | 3.30               | 15.15                 | 4.56                  |
| 79    | IC330562   | Tamil Nadu        | 23.18               | 31.84              | 2.88               | 5.00                  | 4.83                  |
| 80    | IC336492   | Bihar             | 22.92               | 31.50              | 2.47               | 4.75                  | 4.29                  |
| 81    | IC007400   | Unknown           | 24.32               | 27.09              | 3.84               | 8.43                  | 5.76                  |
| 82    | IC625403   | West Bengal       | 25.22               | 28.35              | 3.02               | 5.47                  | 7.89                  |
| 83    | IC023437   | Madhya Pradesh    | 23.83               | 31.01              | 2.62               | 9.34                  | 4.61                  |
| 84    | IC071741   | Tamil Nadu        | 23.78               | 29.38              | 3.92               | 5.36                  | 6.44                  |
| 85    | IC426522   | Andhra Pradesh    | 24.41               | 28.79              | 3.71               | 8.28                  | 7.86                  |
| 86    | IC426521   | Andhra Pradesh    | 23.99               | 30.03              | 3.37               | 5.89                  | 5.50                  |
| 87    | IC426538   | Andhra Pradesh    | 24.66               | 29.08              | 3.47               | 7.65                  | 6.61                  |
| 88    | IC426571   | Andhra Pradesh    | 25.02               | 28.11              | 3.58               | 4.87                  | 6.94                  |

| S.No. | IC Number | State          | Protein<br>(g/100g) | Starch<br>(g/100g) | Sugars<br>(g/100g) | Phytic acid<br>(mg/g) | Phenols<br>(mg GAE/g) |
|-------|-----------|----------------|---------------------|--------------------|--------------------|-----------------------|-----------------------|
| 89    | IC089016  | Tamil Nadu     | 24.29               | 30.10              | 4.31               | 11.84                 | 8.46                  |
| 90    | IC019431  | Odisha         | 24.18               | 30.18              | 3.64               | 2.83                  | 4.98                  |
| 91    | IC139560  | Telangana      | 23.51               | 31.89              | 3.30               | 4.47                  | 7.02                  |
| 92    | IC094617  | Madhya Pradesh | 22.78               | 30.97              | 2.69               | 5.73                  | 5.38                  |
| 93    | IC105564  | Jharkhand      | 22.32               | 31.95              | 4.64               | 10.57                 | 3.85                  |
| 94    | IC033124  | Maharashtra    | 23.83               | 30.26              | 2.69               | 9.48                  | 6.05                  |
| 95    | IC343814  | Andhra Pradesh | 22.56               | 32.60              | 2.83               | 8.94                  | 6.55                  |
| 96    | IC341255  | Maharashtra    | 22.82               | 31.58              | 2.60               | 9.28                  | 4.84                  |
| 97    | IC426452  | Telangana      | 22.84               | 31.61              | 5.75               | 14.37                 | 7.01                  |
| 98    | IC426464  | Telangana      | 22.11               | 31.82              | 3.13               | 5.87                  | 5.39                  |
| 99    | IC426463  | Telangana      | 21.77               | 33.00              | 2.68               | 12.33                 | 5.48                  |
| 100   | IC022772  | Chattisgarh    | 24.95               | 27.00              | 0.86               | 16.71                 | 3.96                  |
| 101   | IC022770  | Chattisgarh    | 24.65               | 28.78              | 1.39               | 14.27                 | 5.61                  |
| 102   | IC541565  | Unknown        | 24.20               | 30.32              | 3.80               | 12.20                 | 6.10                  |
| 103   | EC501564  | Ethopia        | 24.95               | 29.56              | 3.57               | 11.91                 | 8.40                  |
| 104   | IC022779A | Madhya Pradesh | 23.09               | 31.34              | 3.42               | 7.30                  | 4.79                  |
| 105   | IC022781  | Madhya Pradesh | 23.38               | 31.39              | 1.60               | 10.14                 | 3.76                  |
| 106   | IC426580  | Andhra Pradesh | 24.18               | 30.52              | 3.20               | 7.03                  | 5.14                  |
| 107   | IC426579  | Andhra Pradesh | 25.11               | 28.77              | 2.79               | 4.64                  | 5.77                  |
| 108   | IC045726  | West Bengal    | 23.92               | 30.14              | 3.23               | 11.70                 | 5.72                  |
| 109   | IC045717A | Tamil Nadu     | 24.57               | 28.94              | 3.58               | 6.38                  | 7.01                  |
| 110   | IC047114  | Andhra Pradesh | 24.79               | 28.27              | 3.92               | 13.25                 | 5.85                  |
| 111   | IC049553  | Maharashtra    | 23.49               | 30.83              | 3.80               | 17.05                 | 4.80                  |
| 112   | IC044023  | Kerala         | 25.04               | 27.66              | 4.79               | 11.13                 | 6.36                  |
| 113   | IC105820  | Jharkhand      | 23.75               | 31.01              | 3.02               | 18.84                 | 5.21                  |
| 114   | IC120835  | Unknown        | 24.27               | 30.40              | 3.04               | 11.64                 | 4.57                  |
| 115   | IC071784  | Tamil Nadu     | 22.40               | 29.74              | 3.62               | 11.32                 | 6.10                  |
| 116   | IC071773  | Tamil Nadu     | 24.39               | 29.81              | 3.20               | 21.21                 | 5.60                  |
| 117   | IC139561  | Tamil Nadu     | 24.57               | 30.68              | 2.67               | 5.27                  | 5.31                  |
| 118   | IC120838  | Unknown        | 25.20               | 27.74              | 3.23               | 17.12                 | 5.15                  |
| 119   | IC123022  | Unknown        | 23.54               | 28.81              | 3.71               | 11.11                 | 5.46                  |
| 120   | IC256885  | Odisha         | 26.15               | 28.49              | 2.59               | 12.80                 | 5.17                  |
| 121   | IC328712  | Andhra Pradesh | 24.45               | 28.27              | 2.99               | 4.29                  | 6.14                  |
| 122   | IC023482  | Madhya Pradesh | 26.70               | 28.96              | 1.31               | 14.16                 | 3.38                  |
| 123   | IC071733  | Tamil Nadu     | 24.39               | 30.60              | 3.20               | 21.21                 | 5.60                  |
| 124   | IC044021  | Kerala         | 26.05               | 28.11              | 3.29               | 19.21                 | 4.74                  |
| 125   | IC385836  | Jharkhand      | 23.57               | 30.94              | 2.36               | 16.60                 | 5.21                  |
| 126   | IC022756  | Chattisgarh    | 24.10               | 30.24              | 3.36               | 17.53                 | 4.95                  |
| 127   | IC022840  | Unknown        | 23.60               | 30.49              | 3.22               | 16.37                 | 5.01                  |
| 128   | IC123029  | Unknown        | 23.76               | 29.80              | 4.28               | 11.46                 | 5.40                  |
| 129   | IC139512  | Kerala         | 25.94               | 30.22              | 3.60               | 14.40                 | 3.93                  |
| 130   | IC071825  | Tamil Nadu     | 23.78               | 28.88              | 3.16               | 14.24                 | 4.81                  |
| 131   | IC201115  | Chattisgarh    | 23.75               | 29.31              | 2.49               | 11.79                 | 4.70                  |
| 132   | IC022795  | Chattisgarh    | 25.76               | 30.00              | 2.46               | 5.21                  | 3.81                  |
| 133   | IC023439A | Chattisgarh    | 25.29               | 27.03              | 3.30               | 5.48                  | 4.86                  |
| 134   | IC201108  | Chattisgarh    | 25.76               | 28.75              | 3.01               | 9.38                  | 6.96                  |
| 135   | IC071757  | Tamil Nadu     | 24.78               | 28.11              | 3.96               | 8.38                  | 5.45                  |
| 136   | IC094599A | Jharkhand      | 23.70               | 29.53              | 4.53               | 7.96                  | 6.63                  |
| 137   | IC0369691 | Andhra Pradesh | 24.48               | 26.20              | 3.14               | 10.00                 | 5.35                  |
| 138   | IC015735  | Jharkhand      | 24.72               | 27.61              | 5.95               | 5.43                  | 7.79                  |
| 139   | IC015728  | Jharkhand      | 23.25               | 28.80              | 4.75               | 3.62                  | 6.00                  |

**Supplementary Table S2.** Extent of variance explained by principle components

| Principle Component | Eigen Value | Variance % | Cumulative Variance% |
|---------------------|-------------|------------|----------------------|
| PC-1                | 1.987       | 39.73      | 39.73                |
| PC-2                | 1.430       | 28.59      | 68.33                |
| PC-3                | 0.999       | 19.99      | 88.32                |
| PC-4                | 0.294       | 5.88       | 94.20                |
| PC-5                | 0.290       | 5.80       | 100.00               |

**Supplementary Table S3.** Percent contributions of the variables in principle components

| SN. | Variable    | PC-1    | PC-2    | PC-3    | PC-4    | PC-5    |
|-----|-------------|---------|---------|---------|---------|---------|
| 1   | Sugars      | 34.96%  | 1.54%   | 5.32%   | 15.72%  | 42.46%  |
| 2   | Starch      | 21.87%  | 8.51%   | 3.66%   | 62.70%  | 3.26%   |
| 3   | Protein     | 14.15%  | 36.03%  | 15.77%  | 20.80%  | 13.26%  |
| 4   | Phytic acid | 1.00%   | 35.10%  | 63.44%  | 0.20%   | 0.26%   |
| 5   | Phenols     | 28.02%  | 18.84%  | 11.81%  | 0.58%   | 40.76%  |
|     | Total       | 100.00% | 100.00% | 100.00% | 100.00% | 100.00% |

**Supplementary Table S4.** Correlations between variables and Principle Components

| S.N. | Variable    | PC-1  | PC-2  | PC-3  | PC-4  | PC-5  |
|------|-------------|-------|-------|-------|-------|-------|
| 1    | Sugars      | -0.78 | 0.13  | 0.23  | 0.35  | 0.45  |
| 2    | Starch      | -0.62 | -0.30 | -0.19 | -0.69 | 0.12  |
| 3    | Protein     | 0.50  | 0.62  | 0.39  | -0.40 | 0.25  |
| 4    | Phytic acid | 0.13  | -0.61 | 0.78  | -0.04 | -0.04 |
| 5    | Phenols     | -0.70 | 0.45  | 0.34  | -0.07 | -0.44 |

**Supplementary Table S5.** HCA clustering pattern and composition

| States Name      | No. of States Represented in cluster |    |     |    |   | Total |
|------------------|--------------------------------------|----|-----|----|---|-------|
|                  | I                                    | II | III | IV | V |       |
| Uttarakhand      | 17                                   | 0  | 6   | 6  | 0 | 29    |
| Chhattisgarh     | 4                                    | 3  | 4   | 1  | 4 | 16    |
| Madhya Pradesh   | 4                                    | 2  | 2   | 5  | 1 | 14    |
| Andhra Pradesh   | 2                                    | 3  | 6   | 1  | 1 | 13    |
| Himachal Pradesh | 8                                    | 0  | 2   | 2  | 0 | 12    |
| Jharkhand        | 0                                    | 2  | 5   | 3  | 2 | 12    |
| Tamil Nadu       | 1                                    | 3  | 3   | 0  | 3 | 10    |
| Unknown          | 0                                    | 6  | 0   | 0  | 2 | 8     |

|                   |    |    |    |    |    |     |
|-------------------|----|----|----|----|----|-----|
| Maharashtra       | 0  | 2  | 0  | 2  | 1  | 5   |
| Odisha            | 2  | 0  | 1  | 1  | 1  | 5   |
| Telangana         | 1  | 1  | 2  | 1  | 0  | 5   |
| Kerala            | 0  | 1  | 0  | 0  | 2  | 3   |
| West Bengal       | 0  | 1  | 1  | 0  | 0  | 2   |
| Rajasthan         | 1  | 0  | 0  | 0  | 0  | 1   |
| Arunachal Pradesh | 1  | 0  | 0  | 0  | 0  | 1   |
| Delhi             | 1  | 0  | 0  | 0  | 0  | 1   |
| Bihar             | 0  | 0  | 1  | 0  | 0  | 1   |
| Ethopia           | 1  | 0  | 0  | 0  | 0  | 1   |
| Total             | 43 | 24 | 33 | 22 | 17 | 139 |

**Supplementary Table S6.** State-wise mean values of the traits investigated in the study

| SN                 | State/ Country of origin | No of Accessions | Phenols mg GAE/g | Sugars g/100g | Protein g/100g | Starch g/100g | phytic acid mg/g |
|--------------------|--------------------------|------------------|------------------|---------------|----------------|---------------|------------------|
| 1                  | Andhra Pradesh           | 13               | 6.52             | 4.42          | 24.19          | 29.31         | 7.92             |
| 2                  | Arunachal Pradesh        | 1                | 8.25             | 6.40          | 23.58          | 30.32         | 11.74            |
| 3                  | Bihar                    | 1                | 4.29             | 2.47          | 22.92          | 31.50         | 4.75             |
| 4                  | Chattisgarh              | 16               | 6.43             | 5.38          | 24.25          | 28.88         | 9.82             |
| 5                  | Delhi                    | 1                | 6.97             | 3.99          | 21.77          | 32.00         | 7.47             |
| 6                  | Ethopia                  | 1                | 8.40             | 3.57          | 24.95          | 29.56         | 11.91            |
| 7                  | Himachal Pradesh         | 12               | 8.04             | 8.02          | 23.24          | 29.81         | 9.93             |
| 8                  | Jharkhand                | 12               | 7.24             | 5.58          | 23.85          | 29.29         | 10.68            |
| 9                  | Kerala                   | 3                | 5.01             | 3.89          | 25.68          | 28.66         | 14.91            |
| 10                 | Madhya Pradesh           | 14               | 6.61             | 6.24          | 23.70          | 30.27         | 11.33            |
| 11                 | Maharashtra              | 5                | 7.03             | 4.59          | 23.52          | 30.55         | 14.79            |
| 12                 | Odisha                   | 5                | 6.57             | 6.10          | 24.13          | 29.78         | 10.36            |
| 13                 | Rajasthan                | 1                | 6.89             | 7.78          | 23.85          | 29.16         | 10.85            |
| 14                 | Tamil Nadu               | 10               | 5.96             | 3.45          | 24.01          | 29.81         | 11.02            |
| 15                 | Telangana                | 5                | 6.24             | 3.66          | 22.51          | 32.08         | 9.11             |
| 16                 | Unknown                  | 8                | 5.23             | 3.53          | 24.14          | 29.33         | 12.54            |
| 17                 | Uttarakhand              | 29               | 8.47             | 7.22          | 23.22          | 30.19         | 8.78             |
| 18                 | West Bengal              | 2                | 6.81             | 3.12          | 24.57          | 29.25         | 8.59             |
| Total/Overall mean |                          | 139              | 7.00             | 5.61          | 23.74          | 29.81         | 10.15            |

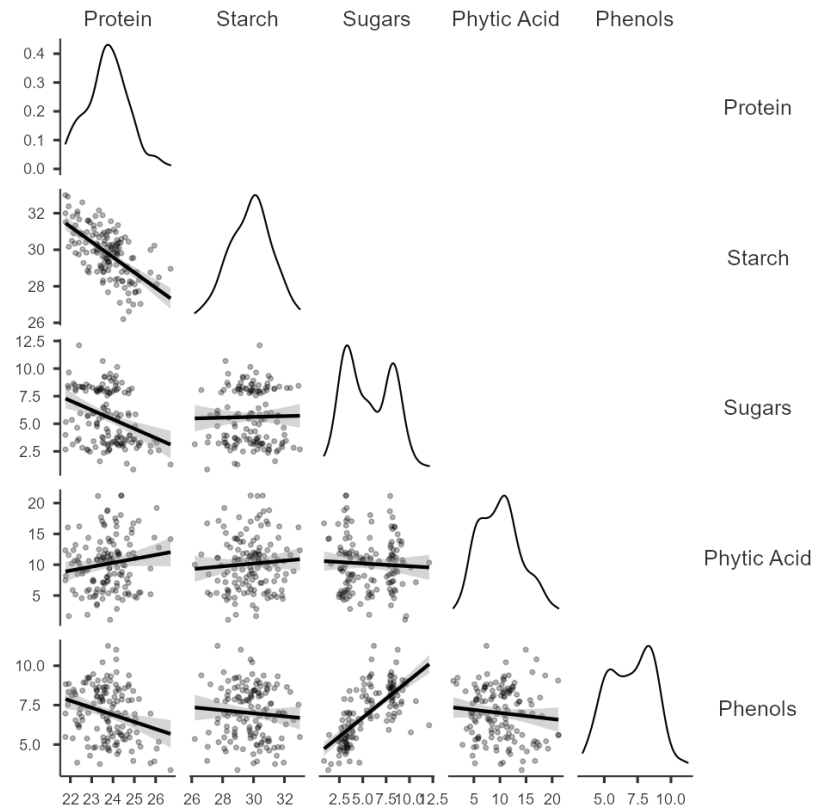

**Suplimentary Fig. 1** Correlogram scatter plot matrix explaining extent of variation, data distribution and correlation of biochemicals

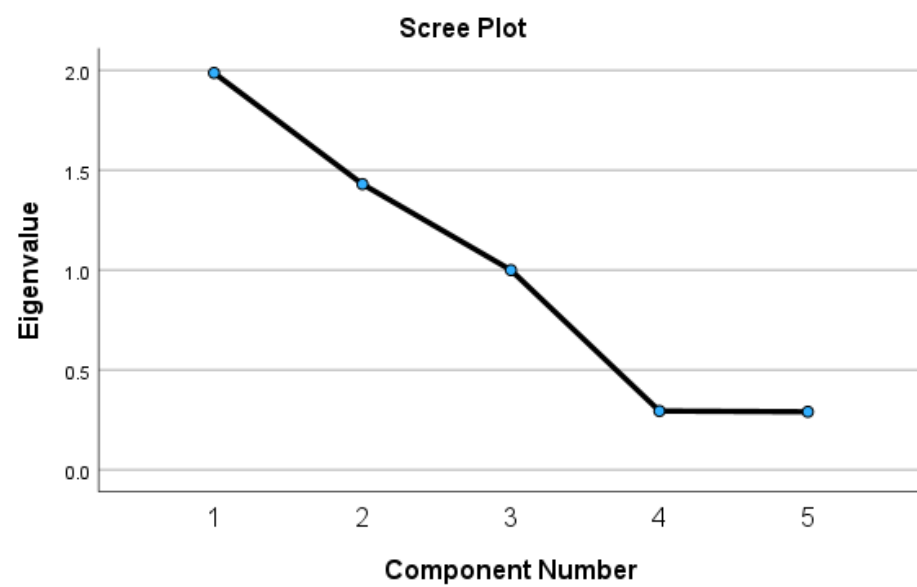

**Supplementary Fig. 2 PCA Scree plot**
